# Supplementary material for: New genes of Xanthomonas citri subsp. citri involved in pathogenesis and adaptation revealed by a transposon-based mutant library
Source: PubMed Central journal article supplement (PMC2653504; doi:10.1186/1471-2180-9-12), 2009-01-16
Supplement: 1471-2180-9-12-S1.pdf [file 1471-2180-9-12-S1.pdf]

Table 2 - Characterization of XCC mutants<sup>a</sup>

| PHENOTYPE CHARACTERIZATION                                                          | XCC ID (Psort/SignalP) <sup>b</sup><br>PRODUCT (gene name)<br>MUTANT(S)<br>DOMAIN STRUCTURE <sup>c</sup>                                                         | PHENOTYPE |     |     |      | NB <sup>d</sup> | R <sup>e</sup> | Cf <sup>f</sup> |
|-------------------------------------------------------------------------------------|------------------------------------------------------------------------------------------------------------------------------------------------------------------|-----------|-----|-----|------|-----------------|----------------|-----------------|
|                                                                                     |                                                                                                                                                                  | WS        | HYP | NEC | HR-1 |                 |                |                 |
|    | XAC0014 (IM/NS)<br>Cardiolipin synthetase (cls)<br>19C02 / IC02<br>            | ND        | ND  | ND  | +    | —               | X              | II.D.12         |
|    | XAC0095 (BC/NS)<br>Xanthomonas conserved<br>hypothetical protein<br>10H02*<br> | 0         | -   | +   | ND   | X               | X              | VIII.C          |
|    | XAC0102 (BC/NS)<br>Conserved hypothetical protein<br>16G10<br>                 | 0         | -   | +   | ND   | X               | —              | VIII.A          |
|   | XAC0144 (OU+PS/SP)<br>TonB-dependent receptor (iroN)<br>14E06<br>            | 0         | -   | +   | ND   | —               | —              | V.A.7           |
|  | XAC0340 (BC/NS)<br>Conserved hypothetical protein<br>18C05<br>               | 0         | 0   | 0   | 0    | X               | X              | VIII.A          |

Continue in the next page

Table 2 – continued

| PHENOTYPE CHARACTERIZATION                                                          | XCC ID (Psort/SignalP) <sup>b</sup><br>PRODUCT (gene name)<br>MUTANT(S)<br>DOMAIN STRUCTURE <sup>c</sup>                                                                     | PHENOTYPE |     |     |      | NB <sup>d</sup> | R <sup>e</sup> | Cf <sup>f</sup> |
|-------------------------------------------------------------------------------------|------------------------------------------------------------------------------------------------------------------------------------------------------------------------------|-----------|-----|-----|------|-----------------|----------------|-----------------|
|                                                                                     |                                                                                                                                                                              | WS        | HYP | NEC | HR-1 |                 |                |                 |
|    | XAC0410 (IM/NS)<br>HrpB4 protein (hrpB4)<br>02H02<br>                                      | 0         | 0   | 0   | 0    | —               | X              | VII.B           |
|    | XAC0618 (IM/NS)<br>Periplasmic glucan biosynthesis protein (hrpM)<br>14H05<br>             | -         | -   | 0   | ND   | —               | —              | VII.G           |
|    | XAC0756 (IM/SP)<br>Potassium-transporting ATPase A chain (kdpA)<br>11G08<br>               | ND        | -   | +   | ND   | —               | —              | V.A.7           |
|   | XAC0789 (BC/NS)<br>DGTP-pyrophosphohydrolase<br>Thiamine phosphate synthase<br>06H10<br> | 0         | 0   | 0   | 0    | —               | X              | III.A.4         |
|  | XAC0798 (OM+PS/SP)<br>Alpha-amylase (amy)<br>10B07<br>                                   | ND        | ND  | ND  | +    | —               | —              | I.A.1           |

Continue in the next page

Table 2 – continued

| PHENOTYPE CHARACTERIZATION                                                          | XCC ID (Psort/SignalP) <sup>b</sup><br>PRODUCT (gene name)<br>MUTANT(S)<br>DOMAIN STRUCTURE <sup>c</sup>                                                                | PHENOTYPE |     |     |      | NB <sup>d</sup> | R <sup>e</sup> | Cf <sup>f</sup> |
|-------------------------------------------------------------------------------------|-------------------------------------------------------------------------------------------------------------------------------------------------------------------------|-----------|-----|-----|------|-----------------|----------------|-----------------|
|                                                                                     |                                                                                                                                                                         | WS        | HYP | NEC | HR-1 |                 |                |                 |
|    | XAC1201 (IM/NS)<br>Conserved hypothetical protein<br>11C09 / 11D03<br>                | ND        | ND  | ND  | +    | —               | X              | VIII.A          |
|    | XAC1266 (BC/NS)<br>HrpX protein (hrpXct)<br>03C01<br>                                 | 0         | 0   | 0   | 0    | —               | X              | VII.B           |
|    | XAC1669 (BC/NS)<br>Histidine kinase-response<br>regulator hybrid protein<br>18H08<br> | -         | -   | +   | ND   | —               | —              | I.D.3           |
|   | XAC1927 (IM/NS)<br>Fe-S oxidoreductase (aslB)<br>14H02 / 25D11<br>                   | ND        | ND  | ND  | +    | X               | —              | I.C.3           |
|  | XAC2047 (BC/NS)<br>PHA synthase subunit<br>10H09 / 11A04 / 11H07<br>                | ND        | ND  | ND  | +    | X               | —              | IX              |

Continue in the next page

Table 2 – continued

| PHENOTYPE CHARACTERIZATION                                                          | XCC ID (Psort/SignalP) <sup>b</sup><br>PRODUCT (gene name)<br>MUTANT(S)<br>DOMAIN STRUCTURE <sup>c</sup>                                                                                            | PHENOTYPE |     |     |      | NB <sup>d</sup> | R <sup>e</sup> | Cf <sup>f</sup> |
|-------------------------------------------------------------------------------------|-----------------------------------------------------------------------------------------------------------------------------------------------------------------------------------------------------|-----------|-----|-----|------|-----------------|----------------|-----------------|
|                                                                                     |                                                                                                                                                                                                     | WS        | HYP | NEC | HR-1 |                 |                |                 |
|    | <b>XAC2053 (IM/NS)</b><br>Transcription-related protein (tex)<br><b>12G12</b><br>                                 | ND        | ND  | ND  | +    | X               | —              | I.D.2           |
|    | <b>XAC2072 (BC/NS)</b><br>Sugar ABC transporter<br>ATP-binding protein (ugpC)<br><b>18H02 / 18H11 / IIA11</b><br> | ++        | ++  | 0   | ND   | —               | —              | V.A.3           |
|    | <b>XAC2118 (IM/NS)</b><br>Conserved hypothetical protein<br><b>17E05</b><br>                                      | -         | -   | +   | ND   | —               | —              | VIII.A          |
|   | <b>XAC2639 (BC/NS)</b><br>Site-specific DNA methyltransferase<br><b>17F02</b><br>                                | 0         | -   | +   | ND   | —               | —              | II.A.5          |
|  | <b>XAC3136 (BC/NS)</b><br>Two-component system<br>sensor protein (exsG)<br><b>14B07*</b><br>                    | ND        | ND  | ND  | +    | —               | —              | I.D.1           |

Continue in the next page



Table 2 – continued

| PHENOTYPE CHARACTERIZATION                                                          | XCC ID (Psort/SignalP) <sup>b</sup><br>PRODUCT (gene name)<br>MUTANT(S)<br>DOMAIN STRUCTURE <sup>c</sup>                                                                                  | PHENOTYPE |     |     |      | NB <sup>d</sup> | R <sup>e</sup> | Cf <sup>f</sup> |
|-------------------------------------------------------------------------------------|-------------------------------------------------------------------------------------------------------------------------------------------------------------------------------------------|-----------|-----|-----|------|-----------------|----------------|-----------------|
|                                                                                     |                                                                                                                                                                                           | WS        | HYP | NEC | HR-1 |                 |                |                 |
|    | <b>XAC3320 (BC/NS)</b><br>ISxac3 transposase<br><b>10F08</b><br>                                        | ND        | ND  | ND  | +    | —               | —              | VI.C            |
|    | <b>XAC3457 (BC/NS)</b><br>3-isopropylmalate dehydratase<br>subunit (leuD)<br><b>15H10</b><br>           | ND        | ND  | ND  | +    | X               | —              | II.A.2          |
|    | <b>XAC3581 (BC/NS)</b><br>UDP-glucose dehydrogenase (ugd)<br><b>11G01</b><br>                           | 0         | -   | +   | ND   | -               | —              | I.B.11          |
|   | <b>XAC3600 (BC/NS)</b><br>ABC transporter<br>ATP-binding protein (wzt)<br><b>18A01</b><br>            | ++        | ++  | 0   | ND   | —               | —              | V.A.7           |
|  | <b>XAC3607 (BC/NS)</b><br>Type II secretion system<br>protein-like protein (uptC)<br><b>14D01</b><br> | ND        | ND  | ND  | +    | —               | —              | IV.A.2          |

Continue in the next page

Table 2 – continued

| PHENOTYPE CHARACTERIZATION                                                          | XCC ID (Psort/SignalP) <sup>b</sup><br>PRODUCT (gene name)<br>MUTANT(S)<br>DOMAIN STRUCTURE <sup>c</sup>                                                       | PHENOTYPE |     |     |      | NB <sup>d</sup> | R <sup>e</sup> | Cf <sup>f</sup> |
|-------------------------------------------------------------------------------------|----------------------------------------------------------------------------------------------------------------------------------------------------------------|-----------|-----|-----|------|-----------------|----------------|-----------------|
|                                                                                     |                                                                                                                                                                | WS        | HYP | NEC | HR-1 |                 |                |                 |
|    | XAC3673 (IM/NS)<br>Histidine kinase<br>18D06<br>                             | 0         | 0   | 0   | 0    | —               | X              | I.D.3           |
|    | XAC3980 (OM+PS/SP)<br>Protease DO (htrA)<br>19B06<br>                        | 0         | 0   | 0   | 0    | —               | —              | III.C.3         |
|    | XAC4040 (BC/NS)<br>Delta-aminolevulinic acid dehydratase (hemB)<br>11D09<br> | 0         | 0   | 0   | 0    | —               | X              | II.D.12         |
|   | XAC4160 (IM/SP)<br>Cation efflux system protein (czcA)<br>02A03<br>         | -         | -   | 0   | ND   | —               | —              | VIII.C          |
|  | XACb0067 (IM/NS)<br>Tn5045 transposase<br>12H03<br>                        | ND        | -   | +   | ND   | —               | —              | VI.C            |

<sup>a</sup> Data obtained from *Xanthomonas citri* subsp. *citri* genome web page; <sup>b</sup> Psort (<http://psort.nibb.ac.jp/form.html>) and SignalP (<http://www.cbs.dtu.dk/services/SignalP/>) identification (IN – inner membrane, OM – outer membrane, BC – bacterial cytoplasm, PS – periplasmic space, NS – non-secretory, SP – signal peptide); <sup>c</sup> Pfam domain architecture (names listed below); <sup>d</sup> northern blotting analysis

and <sup>e</sup> reactivation curve in plant and in medium culture (“X” - available; “—” - not available); <sup>f</sup> Functional categorization based on genome annotation (<http://genoma4.fcav.unesp.br/xanthomonas/>). The black triangles identify the site of transposition (EZ::Tn KAN-2) for each mutant, and the number represents the specific site of mutation; PHENOTYPE: WS - water soaking formation; Hyp - hyperplasia, Nec - necrosis, HR-1 - hypersensitive-like response (“ND” - not defined; “+” - induction; “++” - overinduction; “-” - repression; “0” - total absence of symptoms). Domains: PLD - phospholipase D active site motif (PF006140); AHAS1 - activator of Hsp90 ATPase homolog 1-like protein (PF08327); Plug - TonB-dependent receptor plug domain (PF07715); TonB\_dep\_rec - TonB dependent receptor (PF00593); DUF24 - HxlR-like helix-turn-helix (PF01638); Glyco\_transfer2 - glycosyl transferase family 2 (PF00535); kdpA - potassium-transporting ATPase A subunit (PF03814); NUDIX - NUDIX domain (PF00293); TMP-TENIndependent receptor plug domain (PF07715) thiamine monophosphate synthase/TENI (PF02581); Alpha\_amylase - alpha-amylase, catalytic domain (PF00128); HDOD - HDOD domain (PF08668); HD - HD domain (PF01966); HTH-AraC - bacterial regulatory helix-turn-helix proteins, AraC family (PF00165); PAS - PAS fold (PF00989); PAS\_3 - PAS fold (PF08447); PAS\_4 - PAS fold (PF08448); HisKA - histidine kinase A (phosphoacceptor) domain (PF00512) ; HATPase - histidine kinase-, DNA gyrase B-, and HSP90-like ATPase (PF02518); Response\_reg - response regulator receiver domain (PF00072); Radical\_SAM - radical SAM superfamily (PF04055); S1 - S1 RNA binding domain (PF00575); ABC\_tran - ABC transporter (PF00005); TOBE - TOBE domain (PF03459); TOBE\_2 - TOBE domain (PF08402); N6\_N4\_Mtase - DNA methylase (PF01555); HWE\_HK - HWE histidine kinase (PF07536); PG\_binding\_1 - putative peptidoglycan binding domain (PF01471); RHS - RHS repeat (PF05593); rve - integrase core domain (PF00665); Aconitase\_c - aconitase C-terminal domain (PF00694); UDPG-MGDP-dh\_N - UDP-glucose/GDP-mannose dehydrogenase family, NAD binding domain (PF03721); UDPG-MGDP-dh - UDP-glucose/GDP-mannose dehydrogenase family, central domain (PF00984); UDPG-MGDP-dh\_C - UDP-glucose/GDP-mannose dehydrogenase family, UDP binding domain(PF03720); GSPILE - Type II/IV secretion system protein (PF00437); UDG - uracil DNA glycosylase superfamily (PF03167); Trypsin - trypsin (PF00089); PDZ - PDZ domain, also known as DHR or GLGF (PF00595); ALAD - delta-aminolevulinic acid dehydratase (PF00490); ACR\_tran - AcrB/AcrD/AcrF family (PF00873); Transposase\_7 - transposase (PF01526).
